# Supplementary material
Source: PubMed Central journal article supplement (PMC3491769)

## Supplementary Figure Legends

**Supplementary Figure 1:** In situ hybridisation for the indicated markers in the E14.5 wild-type dorsal telencephalon. Pictures were taken from <http://www.genepaint.org>.

**Supplementary Figure 2:** Expression of several genes in the dorsal telencephalon is lost in  $Xt^J/Xt^J$  embryos. (A-D) In situ hybridisation for *Lrrn1* (A), *E33013* (B), *Tnfrsf19* (C) and *Vegfc* (D) showing graded expression in the dorsal telencephalon of wild-type embryos. (E-H)  $Xt^J/Xt^J$  embryos lack the corresponding expression domains.

**Supplementary Figure 3:** Motif analysis recovers a consensus site similar to a previously described Lef/Tcf consensus sequence.

Supplementary Figure 1:

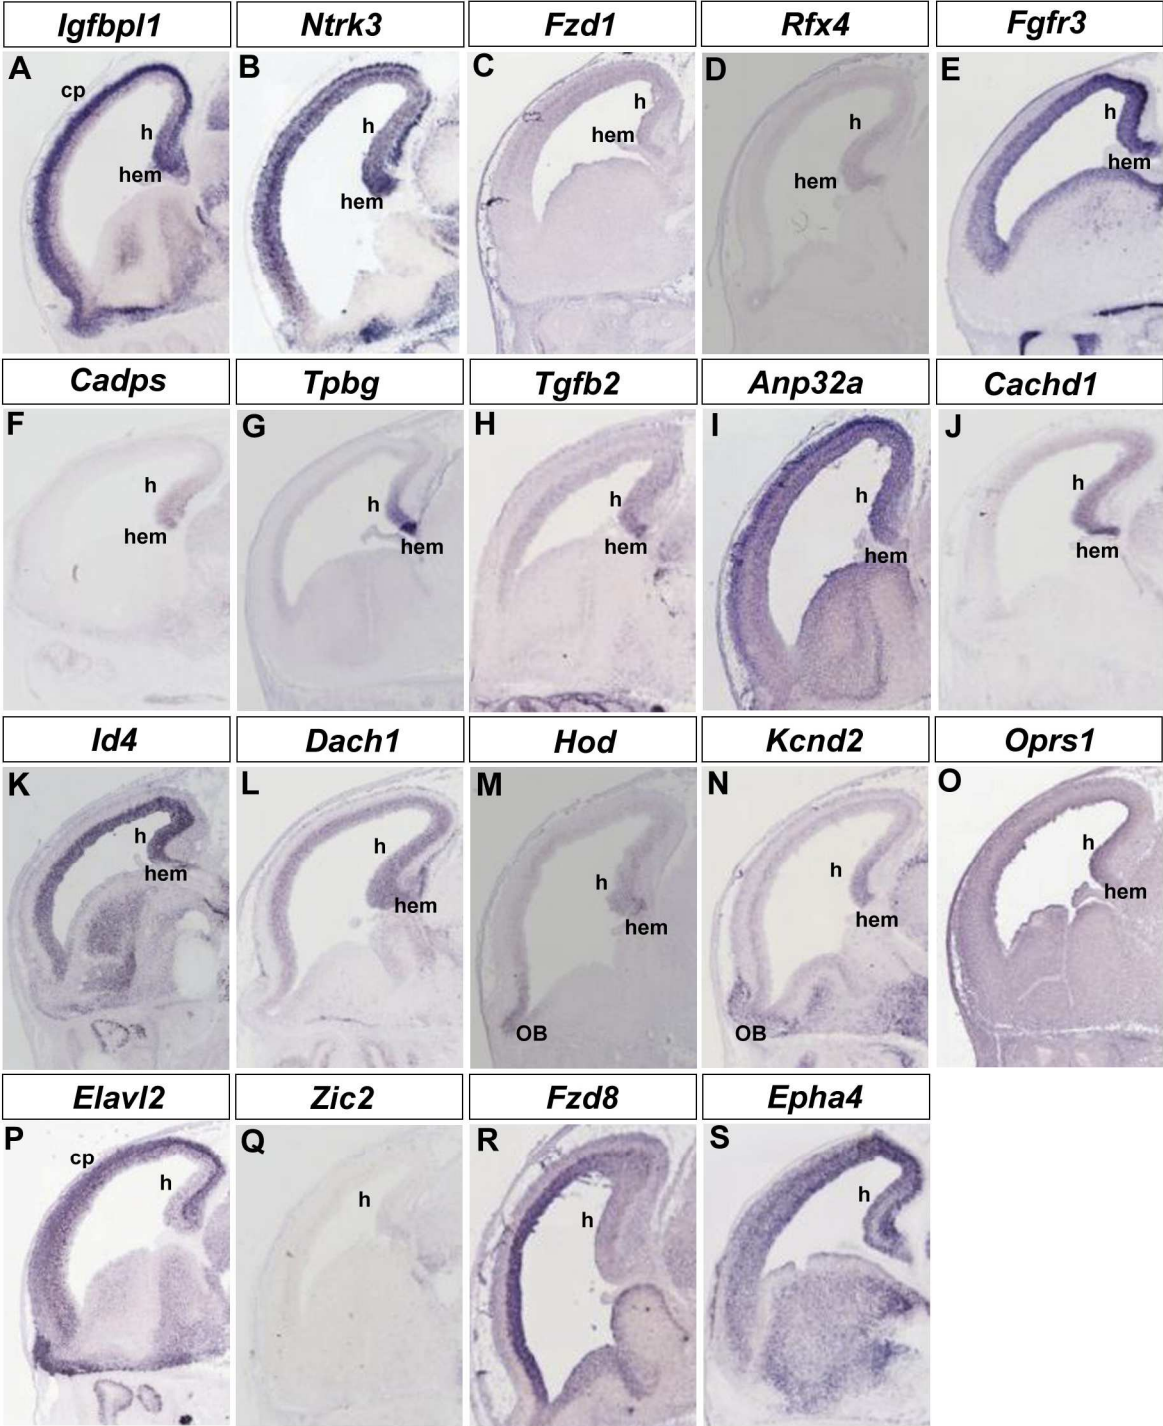

Supplementary Figure 2:

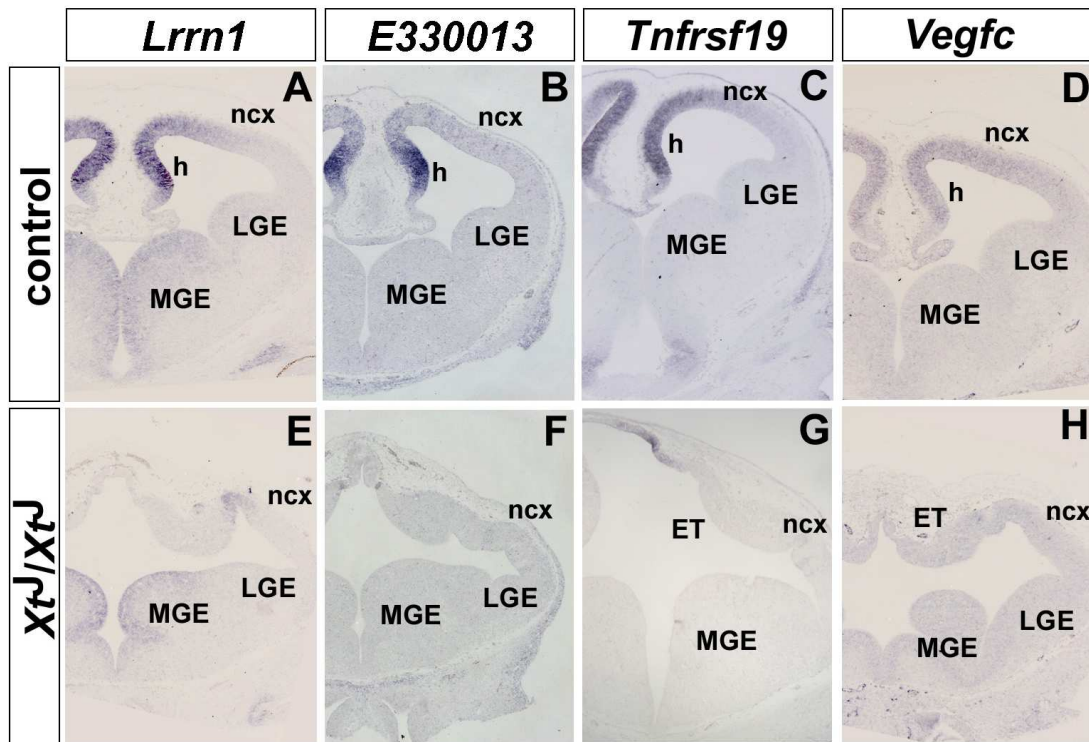

Supplementary Figure 3:

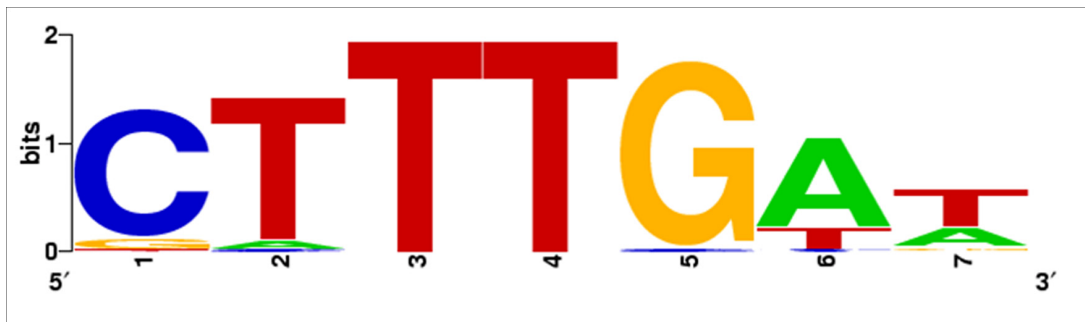

Supplement: supp_bhr365_BHR365_Supplementary_Figures.pdf [file supp_bhr365_BHR365_Supplementary_Figures.pdf]
