# Supplementary material
Source: PubMed Central journal article supplement (PMC3491769)
Supplement: supp_bhr365_BHR365_SuppTab1.pdf [file supp_bhr365_BHR365_SuppTab1.pdf]

VISTA Enhancer Browser

| enhancer ID | fragment length (bp) | Gene  | fwd primer (5' - 3')                                   | rev primer (5'-3')                              | Restriction enzymes used to release the insert for pronuclear injection |
|-------------|----------------------|-------|--------------------------------------------------------|-------------------------------------------------|-------------------------------------------------------------------------|
| hs611       | 854                  | Cux2  | 611fwd: AAAC <del>T</del> CGAGCTCTTCTCTCTGTTCCTGTGGGTC | 611rev: AAAGTCGACCCGACCGTTCCCTCTTCCCT           | XhoI / NotI                                                             |
| hs112       | 1873                 | Dmrt3 | 112.fw3: GACACTGATAGGGTCAGTGC                          | 112.rev3: AACTAGTTTCTCTGGGAAAGAGAG              | NotI                                                                    |
|             |                      |       | 112fw2: GGAAACGGAGTTCATGTGGT                           | 112rev: AAAGTCGACTACCGCCAGCCAAGGAAGAGAGCA       | NotI                                                                    |
| hs111       | 438                  | Gli3  | 111fwd: AAAGGTACCGAGCAATTGCGGAGTGCAGGCC                | 111rev: AAAAAGCTTCATTACCTCTCTCCAACCAGC          | KpnI / NotI                                                             |
| hs1450      | 823                  | Nfia  | NFIA_fw: GCCTGTTTCCTGCCGACCTGA                         | NFIA_rev: CTCCTTGGA <del>A</del> CTCACAGTCAGGGA |                                                                         |
| hs1006      | 1068                 | Wnt8b | Wnt8b_F1: GACCCCTTCCTCCTTGT                            | Wnt8b_R1: GGTTTCCCACACCACTTC                    |                                                                         |
