# Supplementary material
Source: PubMed Central journal article supplement (PMC3491769)
Supplement: supp_bhr365_BHR365_SuppTab2.pdf [file supp_bhr365_BHR365_SuppTab2.pdf]

## Supplementary Table 2

### Oligonucleotides used for mutagenesis

| enhancer ID | Gene  |     | fwd         | fwd primer (5' - 3')                       | rev         | rev primer (5'-3')                          | mutations introduced |
|-------------|-------|-----|-------------|--------------------------------------------|-------------|---------------------------------------------|----------------------|
| hs611       | Cux2  | BS1 | 611-M1fw:   | GAAAAGAACAGGGCTTGATCCCTCC                  | 611-M1rev:  | GGAGGGATCAAGCCCTGTTCTTTTC                   | (AA / GG)            |
|             |       | BS2 | Cux2BS2_mf: | GGCAACCGCACCCGTGAAAATCTCTGG                | Cux2BS2_mr: | CCAGAGATTTTCAGGGTGCGGTTGCC                  | (TT / CC)            |
| hs112       | Dmrt3 |     | 112-M1fw:   | CCCCTCCCTGTCCAATTTCCCTGATGATTTTTCCATAAATGC | 112-M1rev:  | GCATTTATGGGAAAAATCATCAGGGAAATTGGACAGGGAGGGG | (TT / CC)            |
| hs111       | Gli3  |     | 111_M1fw:   | GGAGGAAAAGGACCCCTGAAACTTGAAAGGAAAGAGC      | 111_M1rev:  | GCTCTTTCCTTTCAAGTTTCAGGGTCCTTTTCCTCC        | (TT / CC)            |
| hs1450      | Nfia  |     | NF1a_BSmf:  | CGTTCCAGAAGCCCTGATTACACAATAAC              | NF1a_BSmr:  | GTATTTGTGTAATCAGGGCTTCTGGAACG               | (TT / CC)            |
| hs1006      | Wnt8b |     | W8b_M1F:    | CCTTTAATTTAAACAAGGACTTCAGAGTTC             | W8b_M1R:    | GAACTCTGAAGTCCCTGTTTAAATTAAGG               | (AA / GG)            |
