# Supplementary material
Source: PubMed Central journal article supplement (PMC3491769)
Supplement: supp_bhr365_BHR365_SuppTab3.pdf [file supp_bhr365_BHR365_SuppTab3.pdf]

### Supplementary Table 3

#### Oligonucleotides used for EMSA

| enhancer | fwd           | (5' - 3')                          | rev            | (5' - 3')                           |
|----------|---------------|------------------------------------|----------------|-------------------------------------|
| Cux2     | 611_BS_F      | TGAAAAGAACAAAGCTTGATCCCTC          | 611_BS_R       | GAGGGATCAAGCTTTGTTCTTTTCA           |
| Cux2mut1 | 611mut_BS_F   | TGAAAAGAACA <b>GGG</b> CTTGATCCCTC | 611mut_BS_R    | GAGGGATCAAG <b>CC</b> CTGTTCTTTTCA  |
| Cux2     | Cux2_BS2f     | GCAACCGCACTTTGAAAATCTCTG           | Cux2_BS2r      | CAGAGATTTTCAAAGTGC GGTTGC           |
| Cux2mut2 | Cux2mut_BS2f  | GCAACCGCAC <b>CC</b> TGAAAATCTCTG  | Cux2mut_BS2r   | CAGAGATTTTCA <b>GGG</b> TGC GGTTGC  |
| DMRT3    | 112_BS_1F     | CCAATTTCTTTGATGATTTTTC             | 112_BS_1R      | GAAAAATCATCAAAGAAATTGG              |
| DMRT3mut | 112mut_BS_1F  | CCAATTT <b>CC</b> CTGATGATTTTTC    | 112mut_BS_1R   | GAAAAATCATCA <b>GGG</b> AAATTGG     |
| Gli3     | 111_BS-F      | GGAAAAAGGACTTTGAAACTTGA            | 111_BS_R       | TCAAGTTTCAAAGTCCTTTTCC              |
| Gli3mut  | 111mut_BS_F   | GGAAAAAGGAC <b>CC</b> TGAAACTTGA   | 111_BS- R      | TCAAGTTTCA <b>GGG</b> TCCTTTTCC     |
| NFIA     | NFIA_BS_fw    | GTTCCAGAAGCTTTGATTACACAAA          | NFIA_BS_rev    | TTTGTGTAATCAAAGCTTCTGGAAC           |
| NFIAmut  | NFIA_BSmut_fw | GTTCCAGAAG <b>CC</b> CTGATTACACAAA | NFIA_BSmut_rev | TTTGTGTAATCA <b>GGG</b> GCTTCTGGAAC |
| Wnt8b    | W8b_BS1_F:    | TTTAATTTAAACAAAGACTTCAGAG          | W8b_BS1_R:     | CTCTGAAGTCTTTGTTTAAATAAA            |
| Wnt8bmut | W8bmut_BS1_F: | TTTAATTTAAACA <b>GGG</b> ACTTCAGAG | W8bmut_BS1_R:  | CTCTGAAGT <b>CC</b> CTGTTTAAATAAA   |
