# Supplementary material
Source: PubMed Central journal article supplement (PMC3491769)
Supplement: supp_bhr365_BHR365_SuppTab4.pdf [file supp_bhr365_BHR365_SuppTab4.pdf]

## Supplementary table 4

### Downregulated genes

| #gene name   | sROOTn | fdn  | meanFCrmaN | meanFCnomN | Representative Public ID | Gene Symbol   |
|--------------|--------|------|------------|------------|--------------------------|---------------|
| 1456067_at   | 1.00   | 0.00 | -41.78     | -455.34    | AW546010                 | Gli3          |
| 1455154_at   | 2.67   | 0.00 | -15.88     | -93.18     | BB311687                 | Gli3          |
| 1429905_at   | 12.93  | 0.00 | -4.40      | -11.36     | BB041180                 | 3110009O07Rik |
| 1440707_at   | 15.65  | 0.00 | -4.20      | -10.52     | AV298122                 | Dmrt3         |
| 1416053_at   | 15.01  | 0.00 | -4.14      | -10.26     | NM_008516                | Lrrn1         |
| 1453791_at   | 18.24  | 0.00 | -4.12      | -10.21     | BB648310                 | 2810449C10Rik |
| 1418188_a_at | 22.21  | 0.00 | -4.01      | -9.77      | AF146523                 | Malat1        |
| 1436363_a_at | 19.94  | 0.00 | -3.90      | -9.32      | AW049660                 | Nfix          |
| 1437201_at   | 19.08  | 0.00 | -3.85      | -9.14      | AV336083                 | Lrrc4c        |
| 1436392_s_at | 18.63  | 0.00 | -3.84      | -9.10      | BB550860                 | Tcfap2c       |
| 1448977_at   | 20.91  | 0.00 | -3.76      | -8.78      | BC003778                 | Tcfap2c       |
| 1441316_at   | 22.65  | 0.00 | -3.71      | -8.57      | BB234335                 | LOC677060     |
| 1419324_at   | 28.77  | 0.00 | -3.42      | -7.51      | NM_010714                | Lhx9          |
| 1435172_at   | 28.30  | 0.00 | -3.38      | -7.39      | BB128925                 | Eomes         |
| 1450525_at   | 34.30  | 0.00 | -3.31      | -7.13      | NM_008130                | Gli3          |
| 1416711_at   | 34.78  | 0.00 | -3.26      | -6.96      | NM_009322                | Tbr1          |
| 1421439_at   | 36.95  | 0.00 | -3.22      | -6.81      | BG866612                 | Wnt8b         |
| 1418147_at   | 35.56  | 0.00 | -3.20      | -6.74      | BC003778                 | Tcfap2c       |
| 1456258_at   | 36.56  | 0.00 | -3.14      | -6.53      | BG072869                 | Emx2          |
| 1441777_at   | 38.39  | 0.00 | -3.12      | -6.46      | BB741819                 | Emx1          |
| 1449319_at   | 42.74  | 0.00 | -3.02      | -6.14      | NM_138683                | Rspo1         |
| 1455034_at   | 43.79  | 0.00 | -2.98      | -6.00      | BB703394                 | Nr4a2         |
| 1428393_at   | 81.17  | 0.00 | -2.95      | -5.90      | AK003046                 | Nrn1          |
| 1440527_at   | 44.88  | 0.00 | -2.92      | -5.80      | BI440542                 | ---           |
| 1455893_at   | 51.93  | 0.00 | -2.82      | -5.47      | BG067392                 | Rspo2         |
| 1428379_at   | 71.30  | 0.00 | -2.81      | -5.44      | BQ180367                 | Slc17a6       |
| 1438403_s_at | 69.90  | 0.00 | -2.79      | -5.39      | BF537798                 | ---           |
| 1435179_at   | 56.94  | 0.00 | -2.73      | -5.18      | AV252614                 | C130071C03Rik |
| 1456901_at   | 56.85  | 0.00 | -2.72      | -5.16      | AI450842                 | Adamts20      |
| 1423287_at   | 92.80  | 0.00 | -2.71      | -5.13      | AA016422                 | Cbln1         |
| 1422839_at   | 89.63  | 0.00 | -2.68      | -5.03      | NM_009718                | Neurog2       |
| 1427484_at   | 61.85  | 0.00 | -2.65      | -4.96      | BB650819                 | Emf5          |
| 1426001_at   | 66.59  | 0.00 | -2.64      | -4.90      | AB031037                 | Eomes         |
| 1435765_at   | 70.33  | 0.00 | -2.63      | -4.88      | BF464487                 | E130114P18Rik |
| 1419429_at   | 63.35  | 0.00 | -2.63      | -4.87      | NM_016673                | Cntfr         |
| 1436978_at   | 70.02  | 0.00 | -2.54      | -4.62      | AV273409                 | Wnt9a         |
| 1447863_s_at | 69.19  | 0.00 | -2.53      | -4.58      | BB322941                 | Nr4a2         |
| 1450759_at   | 77.05  | 0.00 | -2.52      | -4.55      | NM_007556                | Bmp6          |
| 1450750_a_at | 70.45  | 0.00 | -2.52      | -4.54      | NM_013613                | Nr4a2         |
| 1426301_at   | 106.11 | 0.00 | -2.48      | -4.44      | U95030                   | Alcam         |
| 1422093_at   | 77.37  | 0.00 | -2.48      | -4.44      | NM_009522                | Wnt3a         |
| 1459253_at   | 170.69 | 0.00 | -2.45      | -4.36      | AW556597                 | ---           |
| 1426300_at   | 132.24 | 0.00 | -2.41      | -4.24      | U95030                   | Alcam         |
| 1444216_at   | 90.02  | 0.00 | -2.40      | -4.20      | AW457677                 | Emx1          |
| 1422914_at   | 110.35 | 0.00 | -2.40      | -4.20      | NM_022435                | Sp5           |
| 1440000_at   | 94.68  | 0.00 | -2.36      | -4.10      | BG069958                 | E330013P04Rik |
| 1451129_at   | 98.22  | 0.00 | -2.36      | -4.09      | BC017646                 | Calb2         |
| 1449559_at   | 173.69 | 0.00 | -2.36      | -4.08      | NM_013601                | Msx2          |
| 1418203_at   | 142.18 | 0.00 | -2.36      | -4.08      | NM_021451                | Pmaip1        |
| 1436642_x_at | 90.77  | 0.00 | -2.35      | -4.05      | BE993148                 | Mef2d         |
| 1418189_s_at | 142.25 | 0.00 | -2.34      | -4.02      | AF146523                 | Malat1        |
| 1437555_at   | 261.05 | 0.02 | -2.28      | -3.86      | BB543853                 | E130309B19Rik |
| 1437601_at   | 100.50 | 0.00 | -2.26      | -3.81      | BB438279                 | Otx1          |
| 1418285_at   | 105.35 | 0.00 | -2.26      | -3.80      | NM_010110                | Efnb1         |
| 1434730_at   | 103.79 | 0.00 | -2.25      | -3.78      | BB346879                 | AI854517      |

|              |        |      |       |       |           |                          |
|--------------|--------|------|-------|-------|-----------|--------------------------|
| 1455557_at   | 115.55 | 0.00 | -2.23 | -3.73 | BB751199  | LOC553095                |
| 1452227_at   | 115.17 | 0.00 | -2.23 | -3.72 | BC026655  | 2310045A20Rik            |
| 1448147_at   | 104.00 | 0.00 | -2.22 | -3.70 | NM_013869 | Tnfrsf19                 |
| 1455607_at   | 107.05 | 0.00 | -2.22 | -3.68 | BG072958  | Rspo3                    |
| 1437466_at   | 196.30 | 0.00 | -2.21 | -3.67 | AV315205  | Alcam                    |
| 1437467_at   | 170.56 | 0.00 | -2.21 | -3.66 | AV315205  | Alcam                    |
| 1423493_a_at | 122.26 | 0.00 | -2.19 | -3.62 | BB315728  | Nfix                     |
| 1436364_x_at | 131.14 | 0.00 | -2.18 | -3.58 | AW049660  | Nfix                     |
| 1456632_at   | 174.67 | 0.00 | -2.17 | -3.56 | BB424718  | Bcl11a                   |
| 1421425_a_at | 232.16 | 0.01 | -2.17 | -3.56 | NM_030598 | Dscr111                  |
| 1434295_at   | 162.05 | 0.00 | -2.15 | -3.51 | BE691356  | Rasgrp1                  |
| 1423505_at   | 146.06 | 0.00 | -2.14 | -3.48 | BB114067  | Tagln                    |
| 1418317_at   | 121.25 | 0.00 | -2.13 | -3.47 | NM_010710 | Lhx2                     |
| 1457072_at   | 229.52 | 0.01 | -2.13 | -3.46 | BF731393  | 2410127E16Rik /// Bcl11a |
| 1445181_at   | 128.75 | 0.00 | -2.13 | -3.46 | BM225233  | Eml5                     |
| 1433906_at   | 192.23 | 0.00 | -2.13 | -3.45 | BE956483  | 4933402J24Rik            |
| 1434421_at   | 184.63 | 0.00 | -2.12 | -3.43 | BB344549  | Islr2                    |
| 1417741_at   | 140.93 | 0.00 | -2.11 | -3.40 | NM_133198 | Pygl                     |
| 1429024_at   | 135.57 | 0.00 | -2.09 | -3.36 | AK003783  | 1110018J23Rik            |
| 1429896_at   | 151.69 | 0.00 | -2.09 | -3.36 | BE135996  | 5830408B19Rik            |
| 1435190_at   | 277.44 | 0.02 | -2.09 | -3.34 | BB378591  | Chl1                     |
| 1441579_at   | 137.67 | 0.00 | -2.09 | -3.34 | BB461344  | Dmrta1                   |
| 1423377_at   | 185.69 | 0.00 | -2.08 | -3.33 | BM935068  | Igfbpl1                  |
| 1419663_at   | 244.88 | 0.02 | -2.07 | -3.31 | BB542051  | Ogn                      |
| 1419533_at   | 243.31 | 0.02 | -2.06 | -3.26 | NM_010916 | Nhlh1                    |
| 1434667_at   | 228.68 | 0.01 | -2.05 | -3.25 | BG229308  | Col8a2                   |
| 1421728_at   | 367.08 | 0.06 | -2.05 | -3.24 | NM_053008 | Olig3                    |
| 1450960_at   | 235.98 | 0.02 | -2.04 | -3.22 | BM935068  | Igfbpl1                  |
| 1433825_at   | 154.00 | 0.00 | -2.04 | -3.21 | BM245880  | Ntrk3                    |
| 1434301_at   | 152.24 | 0.00 | -2.01 | -3.15 | BE303700  | D330050I23Rik            |
| 1420512_at   | 349.77 | 0.05 | -2.01 | -3.13 | NM_020265 | Dkk2                     |
| 1449070_x_at | 358.29 | 0.05 | -2.00 | -3.12 | BB770932  | Apcdd1                   |
| 1423286_at   | 235.45 | 0.02 | -2.00 | -3.11 | AA016422  | Cbln1                    |
| 1448395_at   | 160.96 | 0.00 | -2.00 | -3.11 | BI658627  | Sfrp1                    |
| 1438833_at   | 271.60 | 0.02 | -1.99 | -3.09 | BB818947  | Casc5 /// LOC677208      |
| 1425575_at   | 233.84 | 0.01 | -1.99 | -3.08 | M68513    | Epha3                    |
| 1456174_x_at | 559.97 | 0.20 | -1.99 | -3.08 | AV309418  | Ndrp1                    |
| 1433474_at   | 239.32 | 0.02 | -1.98 | -3.07 | BB377340  | Edil3                    |
| 1437983_at   | 177.26 | 0.00 | -1.97 | -3.05 | BB739342  | ---                      |
| 1437284_at   | 180.99 | 0.00 | -1.97 | -3.03 | BB259670  | Fzd1                     |
| 1418028_at   | 373.95 | 0.07 | -1.96 | -3.02 | NM_010024 | Dct                      |
| 1438511_a_at | 181.10 | 0.00 | -1.96 | -3.01 | BB408123  | 1190002H23Rik            |
| 1448494_at   | 175.79 | 0.00 | -1.95 | -3.00 | BB550400  | Gas1                     |
| 1418383_at   | 325.56 | 0.05 | -1.95 | -2.99 | BB770932  | Apcdd1                   |
| 1422324_a_at | 178.27 | 0.00 | -1.94 | -2.96 | NM_008970 | Pthlh                    |
| 1427262_at   | 382.83 | 0.09 | -1.93 | -2.95 | L04961    | Xist                     |
| 1438135_at   | 243.69 | 0.02 | -1.93 | -2.94 | BB541573  | E130114P18Rik            |
| 1423508_at   | 194.85 | 0.00 | -1.93 | -2.94 | BB527816  | Myst4                    |
| 1419633_at   | 394.44 | 0.09 | -1.93 | -2.94 | NM_013702 | Uncx4.1                  |
| 1451424_at   | 237.75 | 0.02 | -1.92 | -2.92 | BC027245  | Gabrp                    |
| 1436931_at   | 251.52 | 0.02 | -1.92 | -2.92 | AV255458  | Rfx4                     |
| 1441107_at   | 188.63 | 0.00 | -1.92 | -2.91 | BB292639  | Dmrta2                   |
| 1439904_at   | 298.12 | 0.03 | -1.92 | -2.91 | BB374771  | Fstl5                    |
| 1435162_at   | 195.46 | 0.00 | -1.91 | -2.90 | BB823350  | Prkg2                    |
| 1454822_x_at | 431.60 | 0.10 | -1.91 | -2.89 | BB271021  | Apcdd1                   |
| 1422670_at   | 290.27 | 0.02 | -1.91 | -2.89 | NM_009708 | Rnd2                     |
| 1455599_at   | 247.33 | 0.02 | -1.91 | -2.88 | AV220135  | Gfod1                    |
| 1418610_at   | 298.56 | 0.03 | -1.90 | -2.87 | NM_080853 | Slc17a6                  |
| 1427263_at   | 408.94 | 0.10 | -1.90 | -2.86 | L04961    | Xist                     |
| 1418382_at   | 414.70 | 0.10 | -1.89 | -2.84 | BB770932  | Apcdd1                   |
| 1429974_at   | 246.67 | 0.02 | -1.88 | -2.83 | AK012980  | Tbx18                    |
| 1435558_at   | 208.45 | 0.01 | -1.87 | -2.80 | BB351248  | Bai2                     |
| 1455298_at   | 223.65 | 0.01 | -1.87 | -2.79 | BB306828  | ---                      |

|              |        |      |       |       |           |               |
|--------------|--------|------|-------|-------|-----------|---------------|
| 1439040_at   | 315.95 | 0.04 | -1.86 | -2.77 | BG068387  | Cenpe         |
| 1460187_at   | 230.98 | 0.01 | -1.86 | -2.77 | BI658627  | Sfrp1         |
| 1449871_at   | 298.18 | 0.03 | -1.86 | -2.76 | NM_023814 | Tbx18         |
| 1451591_a_at | 221.40 | 0.01 | -1.85 | -2.74 | BC006797  | Efnb1         |
| 1418003_at   | 228.70 | 0.01 | -1.84 | -2.73 | NM_025427 | 1190002H23Rik |
| 1454086_a_at | 219.35 | 0.01 | -1.85 | -2.73 | AK013416  | Lmo2          |
| 1418445_at   | 240.25 | 0.02 | -1.84 | -2.71 | AW105741  | ---           |
| 1421841_at   | 380.98 | 0.09 | -1.84 | -2.71 | NM_008010 | Fgfr3         |
| 1451626_x_at | 303.90 | 0.04 | -1.83 | -2.70 | U58494    | ---           |
| 1416203_at   | 272.30 | 0.02 | -1.83 | -2.70 | NM_007472 | Aqp1          |
| 1448955_s_at | 337.24 | 0.06 | -1.83 | -2.70 | NM_012061 | Cadps         |
| 1423310_at   | 241.34 | 0.02 | -1.83 | -2.70 | BQ177165  | Tpbp          |
| 1427232_at   | 236.08 | 0.02 | -1.83 | -2.70 | AV291373  | Tshz1         |
| 1457112_at   | 267.56 | 0.02 | -1.83 | -2.69 | BB183509  | A230106N23    |
| 1441313_x_at | 268.19 | 0.02 | -1.82 | -2.68 | BB104635  | Lhx9          |
| 1418286_a_at | 242.10 | 0.02 | -1.82 | -2.67 | NM_010110 | Efnb1         |
| 1427233_at   | 267.00 | 0.02 | -1.82 | -2.67 | AV291373  | Tshz1         |
| 1449314_at   | 525.68 | 0.19 | -1.82 | -2.67 | NM_011766 | Zfpm2         |
| 1452894_at   | 438.27 | 0.10 | -1.81 | -2.66 | AK013588  | Elavl4        |
| 1427680_a_at | 336.08 | 0.06 | -1.80 | -2.63 | Y07687    | Nfib          |
| 1440204_at   | 253.74 | 0.02 | -1.79 | -2.60 | AW494150  | 3110039M20Rik |
| 1418494_at   | 440.75 | 0.10 | -1.79 | -2.60 | U71189    | Ebf2          |
| 1428136_at   | 266.62 | 0.02 | -1.79 | -2.60 | AK008943  | Sfrp1         |
| 1422694_at   | 329.07 | 0.05 | -1.79 | -2.60 | NM_021324 | Ttyh1         |
| 1436733_at   | 257.08 | 0.02 | -1.79 | -2.59 | BB523550  | E130309F12Rik |
| 1436888_at   | 666.63 | 0.38 | -1.79 | -2.59 | AV322710  | Nhlh2         |
| 1437790_at   | 283.32 | 0.02 | -1.78 | -2.58 | AV230748  | Eml5          |
| 1423311_s_at | 289.15 | 0.02 | -1.78 | -2.58 | BQ177165  | Tpbp          |
| 1433762_at   | 269.23 | 0.02 | -1.77 | -2.56 | BB182501  | C630043F03Rik |
| 1418446_at   | 325.61 | 0.05 | -1.77 | -2.56 | AW105741  | Slc16a2       |
| 1424586_at   | 275.23 | 0.02 | -1.77 | -2.55 | AF424697  | Ehbp1         |
| 1420484_a_at | 431.43 | 0.10 | -1.77 | -2.55 | NM_011707 | Vtn           |
| 1417065_at   | 489.82 | 0.14 | -1.77 | -2.54 | NM_007913 | Egr1          |
| 1427677_a_at | 289.66 | 0.02 | -1.76 | -2.53 | AJ010605  | Sox6          |
| 1455624_at   | 271.77 | 0.02 | -1.76 | -2.52 | BM114403  | ---           |
| 1425574_at   | 383.75 | 0.09 | -1.76 | -2.52 | M68513    | Epha3         |
| 1449102_at   | 475.33 | 0.13 | -1.75 | -2.51 | U71189    | Ebf2          |
| 1418824_at   | 408.65 | 0.10 | -1.74 | -2.49 | BI248938  | Arf6          |
| 1428741_at   | 455.83 | 0.10 | -1.74 | -2.49 | AK013588  | Elavl4        |
| 1419638_at   | 290.28 | 0.02 | -1.74 | -2.47 | U30244    | Efnb2         |
| 1435308_at   | 312.41 | 0.05 | -1.74 | -2.47 | AU067636  | Fut9          |
| 1438551_at   | 318.38 | 0.05 | -1.74 | -2.47 | AI323358  | Neurog1       |
| 1423250_a_at | 648.68 | 0.36 | -1.73 | -2.47 | BF144658  | Tgfb2         |
| 1454675_at   | 452.82 | 0.11 | -1.73 | -2.47 | BI076689  | Thra          |
| 1454834_at   | 390.82 | 0.08 | -1.73 | -2.46 | BI687652  | Nfib          |
| 1450407_a_at | 696.87 | 0.45 | -1.73 | -2.45 | AF022957  | Anp32a        |
| 1436030_at   | 309.00 | 0.05 | -1.72 | -2.44 | BB730977  | Cachd1        |
| 1418141_at   | 657.41 | 0.37 | -1.72 | -2.43 | BB418548  | Dcx           |
| 1444086_at   | 353.23 | 0.05 | -1.72 | -2.43 | BB536333  | E030049G20Rik |
| 1423260_at   | 331.26 | 0.05 | -1.71 | -2.41 | BB121406  | Id4           |
| 1418507_s_at | 317.22 | 0.05 | -1.71 | -2.41 | NM_007706 | Socs2         |
| 1433743_at   | 394.77 | 0.09 | -1.71 | -2.40 | BG075820  | Dach1         |
| 1457409_at   | 351.45 | 0.05 | -1.70 | -2.40 | BB484070  | Fut9          |
| 1455416_at   | 338.92 | 0.06 | -1.70 | -2.38 | AW209204  | C130021I20Rik |
| 1419393_at   | 372.22 | 0.06 | -1.68 | -2.35 | NM_031884 | Abcg5         |
| 1423669_at   | 565.24 | 0.21 | -1.68 | -2.35 | U08020    | Col1a1        |
| 1420695_at   | 345.68 | 0.06 | -1.68 | -2.35 | BB522228  | Dach1         |
| 1416594_at   | 366.97 | 0.06 | -1.68 | -2.35 | BI658627  | Sfrp1         |
| 1424482_at   | 567.79 | 0.21 | -1.68 | -2.34 | AF343877  | Arhgef7       |
| 1460041_at   | 346.29 | 0.05 | -1.68 | -2.34 | BQ173985  | D630040I23Rik |
| 1449109_at   | 341.41 | 0.06 | -1.68 | -2.34 | NM_007706 | Socs2         |
| 1436845_at   | 347.76 | 0.05 | -1.68 | -2.33 | BB398993  | Axin2         |
| 1418496_at   | 767.10 | 0.58 | -1.67 | -2.32 | NM_008259 | Foxa1         |

|                |        |      |       |       |           |                     |
|----------------|--------|------|-------|-------|-----------|---------------------|
| 1451776_s_at   | 375.71 | 0.08 | -1.67 | -2.32 | BC024546  | Hod                 |
| AFFX-18SRNAMur | 360.62 | 0.05 | -1.67 | -2.32 |           |                     |
| 1435605_at     | 388.96 | 0.09 | -1.66 | -2.31 | BB125424  | Actr3b              |
| 1419639_at     | 355.62 | 0.05 | -1.66 | -2.31 | U30244    | Efnb2               |
| 1433600_at     | 397.49 | 0.09 | -1.66 | -2.30 | BB262415  | Adra2a              |
| 1450258_a_at   | 722.16 | 0.48 | -1.66 | -2.30 | NM_010488 | Elavl4              |
| 1423597_at     | 388.49 | 0.09 | -1.65 | -2.28 | BB303874  | Atp8a1              |
| 1437403_at     | 522.07 | 0.18 | -1.65 | -2.28 | BB308071  | E130306M17Rik       |
| 1422835_at     | 538.60 | 0.19 | -1.65 | -2.28 | BB051684  | Kcnd2               |
| 1422625_at     | 516.36 | 0.18 | -1.65 | -2.28 | NM_011837 | Ly6h                |
| 1416855_at     | 380.87 | 0.09 | -1.65 | -2.27 | BB550400  | Gas1                |
| 1440930_a_at   | 658.14 | 0.36 | -1.65 | -2.27 | BG807042  | Scrt2               |
| 1434679_at     | 714.78 | 0.47 | -1.65 | -2.26 | BM945195  | Cspg3               |
| 1439151_at     | 461.39 | 0.11 | -1.64 | -2.26 | BB277041  | Msrb3               |
| 1448713_at     | 433.58 | 0.10 | -1.65 | -2.26 | NM_011487 | Stat4               |
| 1447298_at     | 423.33 | 0.10 | -1.64 | -2.24 | BE953578  | C130071C03Rik       |
| 1439204_at     | 764.61 | 0.58 | -1.64 | -2.24 | BB096886  | Scn3a               |
| 1447655_x_at   | 424.37 | 0.10 | -1.63 | -2.24 | BB257593  | Sox6                |
| 1427600_at     | 421.80 | 0.10 | -1.64 | -2.24 | BC025871  | Tnfrsf19            |
| 1455151_at     | 585.25 | 0.25 | -1.63 | -2.23 | C79026    | Akap9               |
| 1426869_at     | 403.69 | 0.10 | -1.63 | -2.23 | BB005556  | Boc                 |
| 1443273_at     | 686.73 | 0.43 | -1.63 | -2.23 | BB529019  | Epha3               |
| 1436444_at     | 424.25 | 0.10 | -1.62 | -2.21 | AV319257  | 6030405A18Rik       |
| 1460555_at     | 617.43 | 0.32 | -1.62 | -2.21 | BM242294  | 6330500D04Rik       |
| 1449101_at     | 707.45 | 0.46 | -1.62 | -2.21 | U71189    | Ebf2                |
| 1421152_a_at   | 473.38 | 0.13 | -1.62 | -2.21 | NM_010308 | Gnao1               |
| 1435579_at     | 497.17 | 0.15 | -1.62 | -2.21 | BM220110  | Oprs1               |
| 1455426_at     | 630.89 | 0.35 | -1.62 | -2.20 | AV226618  | ---                 |
| 1426057_a_at   | 719.23 | 0.48 | -1.62 | -2.20 | M68515    | Epha3               |
| 1426412_at     | 823.18 | 0.69 | -1.62 | -2.20 | BM116592  | Neurod1             |
| 1445767_at     | 561.13 | 0.20 | -1.62 | -2.20 | BB451347  | Ptprd               |
| 1435337_at     | 426.76 | 0.10 | -1.62 | -2.20 | BB150458  | Tshz3               |
| 1436175_at     | 422.64 | 0.10 | -1.61 | -2.19 | AV227511  | A430107N12Rik       |
| 1456559_at     | 515.94 | 0.18 | -1.61 | -2.19 | AV351746  | Emx2os              |
| 1445503_at     | 424.54 | 0.10 | -1.61 | -2.19 | BQ175936  | Gm715 /// LOC671594 |
| 1436920_at     | 552.80 | 0.20 | -1.61 | -2.19 | BQ176938  | Pcdh17              |
| 1437360_at     | 441.76 | 0.10 | -1.61 | -2.19 | BB053591  | Pcdh19              |
| 1429685_at     | 462.48 | 0.11 | -1.61 | -2.18 | BB313857  | C030002O17Rik       |
| 1417851_at     | 677.78 | 0.42 | -1.61 | -2.18 | AF030636  | Cxcl13              |
| 1421882_a_at   | 519.09 | 0.17 | -1.61 | -2.18 | BB105998  | Elavl2              |
| 1437825_at     | 436.79 | 0.10 | -1.61 | -2.18 | BB351752  | Lrrc4c              |
| 1456543_at     | 426.54 | 0.10 | -1.61 | -2.18 | BB037474  | Prokr1              |
| 1422514_at     | 455.63 | 0.11 | -1.60 | -2.17 | NM_009636 | Aebp1               |
| 1435462_at     | 603.70 | 0.29 | -1.60 | -2.17 | BQ176176  | LOC433022           |
| 1424679_at     | 826.97 | 0.70 | -1.60 | -2.17 | AF228913  | Mab2111             |
| 1441727_s_at   | 610.87 | 0.30 | -1.60 | -2.17 | BE628275  | Zfp467              |
| 1421883_at     | 589.91 | 0.25 | -1.60 | -2.16 | BB105998  | Elavl2              |
| 1440739_at     | 453.72 | 0.11 | -1.60 | -2.16 | AW228853  | Vegfc               |
| 1447500_at     | 469.11 | 0.12 | -1.59 | -2.15 | BB129488  | Cutl1               |
| 1435460_at     | 496.17 | 0.15 | -1.60 | -2.15 | BB363188  | Prkg2               |
| 1421301_at     | 680.02 | 0.42 | -1.59 | -2.15 | NM_009574 | Zic2                |
| 1441572_at     | 919.89 | 0.92 | -1.59 | -2.14 | BB264612  | C030036D22Rik       |
| 1445815_at     | 495.72 | 0.14 | -1.59 | -2.14 | BB086994  | Fzd8                |
| 1417600_at     | 869.31 | 0.79 | -1.59 | -2.14 | NM_021301 | Slc15a2             |
| 1415921_a_at   | 502.05 | 0.15 | -1.59 | -2.14 | NM_013869 | Tnfrsf19            |
| 1455851_at     | 510.16 | 0.17 | -1.59 | -2.13 | AV032115  | Bmp5                |
| 1416147_at     | 637.19 | 0.35 | -1.59 | -2.13 | BE912771  | Hspa4               |
| 1435832_at     | 463.55 | 0.11 | -1.58 | -2.13 | BB332932  | Lrrc4               |
| 1418139_at     | 945.66 | 1.00 | -1.58 | -2.12 | BB418548  | Dcx                 |
| 1429021_at     | 498.01 | 0.15 | -1.58 | -2.12 | AK013481  | Epha4               |
| 1423259_at     | 475.12 | 0.13 | -1.58 | -2.12 | BB121406  | Id4                 |
| 1417129_a_at   | 488.92 | 0.14 | -1.58 | -2.12 | U68384    | Mrg1                |
| 1419017_at     | 471.11 | 0.13 | -1.58 | -2.11 | NM_016869 | Corin               |

|              |         |      |       |       |           |                |
|--------------|---------|------|-------|-------|-----------|----------------|
| 1426621_a_at | 542.72  | 0.19 | -1.58 | -2.11 | BB560759  | Ppp2r2b        |
| 1434918_at   | 479.93  | 0.12 | -1.58 | -2.11 | AV281802  | Sox6           |
| 1455123_at   | 942.87  | 1.00 | -1.58 | -2.11 | BB178719  | St18           |
| 1439887_at   | 589.73  | 0.26 | -1.57 | -2.10 | BB364961  | ---            |
| 1421341_at   | 488.46  | 0.14 | -1.57 | -2.10 | NM_015732 | Axin2          |
| 1423288_s_at | 549.33  | 0.19 | -1.57 | -2.10 | AA016422  | Cbln1          |
| 1421881_a_at | 583.54  | 0.25 | -1.57 | -2.10 | BB105998  | Elavl2         |
| 1424854_at   | 892.31  | 0.83 | -1.57 | -2.10 | BC019757  | Hist1h4i       |
| 1446990_at   | 696.94  | 0.45 | -1.57 | -2.10 | AW556192  | Nfia           |
| 1430030_at   | 579.81  | 0.25 | -1.57 | -2.09 | AK019912  | 5330426P16Rik  |
| 1420947_at   | 671.29  | 0.40 | -1.57 | -2.09 | BB825830  | Atrx           |
| 1456379_x_at | 1082.87 | 1.46 | -1.57 | -2.09 | BB038556  | Dner           |
| 1437791_s_at | 540.59  | 0.19 | -1.57 | -2.09 | AV230748  | Eml5           |
| 1427246_at   | 929.09  | 0.95 | -1.56 | -2.08 | BB702366  | Magi1          |
| 1443926_at   | 819.47  | 0.69 | -1.56 | -2.08 | BM124348  | Mrg1           |
| 1439427_at   | 679.24  | 0.42 | -1.56 | -2.07 | BB026487  | Cldn9          |
| 1447174_at   | 912.60  | 0.91 | -1.56 | -2.07 | BB374930  | Dach1          |
| 1450928_at   | 517.28  | 0.17 | -1.56 | -2.07 | BB121406  | Id4            |
| 1448288_at   | 707.10  | 0.46 | -1.56 | -2.07 | BB832504  | Nfib           |
| 1425212_a_at | 685.82  | 0.43 | -1.56 | -2.07 | AF167554  | Tnfrsf19       |
| 1419417_at   | 540.25  | 0.19 | -1.56 | -2.07 | NM_009506 | Vegfc          |
| 1449548_at   | 535.25  | 0.19 | -1.55 | -2.06 | U30244    | Efnb2          |
| 1456084_x_at | 670.13  | 0.40 | -1.55 | -2.06 | BB532202  | Fmod           |
| 1436719_at   | 699.99  | 0.46 | -1.55 | -2.06 | BB758319  | Slc35f1        |
| 1415978_at   | 978.34  | 1.13 | -1.55 | -2.06 | NM_023279 | Tubb3          |
| 1443187_at   | 535.98  | 0.19 | -1.55 | -2.05 | AV235077  | ---            |
| 1454424_at   | 800.66  | 0.63 | -1.55 | -2.05 | AK011729  | 2610040L17Rik  |
| 1436031_at   | 540.72  | 0.19 | -1.55 | -2.05 | BB730977  | Cachd1         |
| 1431663_a_at | 534.90  | 0.19 | -1.55 | -2.05 | AK015675  | Cntrf          |
| 1450771_at   | 573.73  | 0.24 | -1.55 | -2.05 | NM_010243 | Fut9           |
| 1454997_at   | 570.74  | 0.22 | -1.55 | -2.05 | AV286522  | Msrb3          |
| 1453070_at   | 867.30  | 0.80 | -1.55 | -2.05 | BB305930  | Pcdh17         |
| 1452325_at   | 520.71  | 0.18 | -1.55 | -2.05 | AK014503  | Trp73          |
| 1422695_at   | 934.18  | 0.96 | -1.55 | -2.05 | NM_021324 | Ttyh1 /// Taf1 |
| 1449422_at   | 679.43  | 0.42 | -1.54 | -2.04 | NM_009867 | Cdh4           |
| 1415999_at   | 540.58  | 0.19 | -1.54 | -2.04 | NM_010423 | Hey1           |
| 1454734_at   | 547.76  | 0.19 | -1.54 | -2.03 | AV156352  | ---            |
| 1439543_at   | 742.42  | 0.53 | -1.54 | -2.03 | BF180451  | 1110064A23Rik  |
| 1434957_at   | 567.03  | 0.21 | -1.54 | -2.03 | AW557006  | Cdon           |
| 1428186_at   | 541.27  | 0.19 | -1.54 | -2.03 | AK017384  | Kctd6          |
| 1434539_at   | 990.36  | 1.15 | -1.54 | -2.03 | AI852420  | Lrrn3          |
| 1452899_at   | 705.46  | 0.46 | -1.54 | -2.03 | AK017440  | Rian           |
| 1420719_at   | 583.59  | 0.25 | -1.54 | -2.03 | NM_031374 | Tex15          |
| 1450923_at   | 969.18  | 1.09 | -1.54 | -2.03 | BF144658  | Tgfb2          |
| 1423852_at   | 556.56  | 0.20 | -1.54 | -2.03 | BC024118  | Tmem46         |
| 1421195_at   | 661.11  | 0.37 | -1.54 | -2.02 | BC020534  | Cckar          |
| 1457324_at   | 651.58  | 0.36 | -1.53 | -2.02 | BM115786  | Oprs1          |
| 1438134_at   | 898.51  | 0.86 | -1.54 | -2.02 | AV341417  | Pcdh10         |
| 1419453_at   | 720.15  | 0.48 | -1.54 | -2.02 | AV313813  | Uchl5          |
| 1455231_s_at | 994.87  | 1.16 | -1.53 | -2.01 | BM114349  | ---            |
| 1440487_at   | 1217.91 | 1.98 | -1.53 | -2.01 | BE824778  | ---            |
| 1433965_at   | 567.35  | 0.21 | -1.53 | -2.01 | BQ176779  | Atp8a1         |
| 1457632_s_at | 636.05  | 0.35 | -1.53 | -2.01 | BB207647  | Mrg1           |
| 1450287_at   | 757.37  | 0.57 | -1.53 | -2.01 | BE288934  | Npas3          |
| 1456087_at   | 980.48  | 1.13 | -1.52 | -2.00 | BB089547  | Nfia           |
| 1450922_a_at | 1044.68 | 1.31 | -1.52 | -2.00 | BF144658  | Tgfb2          |
