# Supplementary material
Source: PubMed Central journal article supplement (PMC3491769)
Supplement: supp_bhr365_BHR365_SuppTab5.pdf [file supp_bhr365_BHR365_SuppTab5.pdf]

## Supplementary Table 5

### Up-regulated genes

| #gene name   | sROOTp | fdrp | meanFCrmaP | meanFCnomP | Representative Public ID | Gene Symbol   |
|--------------|--------|------|------------|------------|--------------------------|---------------|
| 1422545_at   | 4.29   | 0.00 | 4.59       | 12.17      | NM_009324                | ---           |
| 1419408_at   | 12.15  | 0.00 | 3.79       | 8.88       | AF050130                 | Six6          |
| 1427300_at   | 37.44  | 0.00 | 3.38       | 7.37       | D49658                   | Lhx8          |
| 1416776_at   | 16.32  | 0.00 | 3.01       | 6.41       | NM_016669                | Crym          |
| 1418476_at   | 22.85  | 0.00 | 2.81       | 5.44       | NM_018827                | Crlf1         |
| 1437479_x_at | 32.53  | 0.00 | 2.07       | 5.11       | BB728182                 | Tbx3          |
| 1448029_at   | 33.36  | 0.00 | 2.66       | 4.97       | AA543734                 | Tbx3          |
| 1444043_at   | 33.23  | 0.00 | 2.53       | 4.59       | AI173484                 | Gli3          |
| 1436869_at   | 127.46 | 0.00 | 2.52       | 4.56       | AV304616                 | Shh           |
| 1455498_at   | 108.32 | 0.00 | 2.38       | 4.16       | BQ032613                 | Gpr50         |
| 1431168_at   | 48.81  | 0.00 | 2.33       | 4.00       | AW209946                 | Six3os1       |
| 1451882_a_at | 64.57  | 0.00 | 2.26       | 3.82       | U18673                   | Fgf8          |
| 1441429_at   | 52.54  | 0.00 | 2.26       | 3.82       | BB295945                 | Irs4          |
| 1416149_at   | 91.99  | 0.00 | 2.24       | 3.76       | AB038696                 | Olig1         |
| 1438042_at   | 168.67 | 0.04 | 2.21       | 3.68       | AV332957                 | Shox2         |
| 1459790_x_at | 73.93  | 0.00 | 2.02       | 3.64       | AV169968                 | Alx3          |
| 1427571_at   | 116.14 | 0.00 | 2.18       | 3.58       | X76290                   | Shh           |
| 1448321_at   | 65.41  | 0.00 | 2.17       | 3.57       | NM_022316                | Smoc1         |
| 1448326_a_at | 74.08  | 0.00 | 2.15       | 3.52       | NM_013496                | Crabp1        |
| 1424007_at   | 58.98  | 0.00 | 2.14       | 3.49       | L42114                   | Gdf10         |
| 1457396_at   | 79.79  | 0.00 | 2.14       | 3.48       | BB444165                 | ---           |
| 1428485_at   | 110.70 | 0.00 | 2.13       | 3.46       | AK009873                 | Car12         |
| 1422346_at   | 110.53 | 0.00 | 2.12       | 3.42       | NM_009385                | Titf1         |
| 1451342_at   | 160.77 | 0.02 | 2.01       | 3.37       | BC020531                 | Spon1         |
| 1455604_at   | 86.97  | 0.00 | 2.09       | 3.35       | BB795235                 | Fzd5          |
| 1456239_at   | 96.89  | 0.00 | 2.07       | 3.29       | BB801085                 | Fgf17         |
| 1460038_at   | 204.24 | 0.05 | 2.05       | 3.24       | BG065255                 | Pou3f1        |
| 1418678_at   | 101.42 | 0.00 | 2.01       | 3.15       | NM_008216                | Has2          |
| 1453599_at   | 105.43 | 0.00 | 2.01       | 3.15       | BB712433                 | Trim71        |
| 1454681_at   | 118.76 | 0.00 | 2.01       | 3.14       | BG070112                 | Rbm35a        |
| 1457424_at   | 90.03  | 0.00 | 2.00       | 3.12       | BB760085                 | Eya1          |
| 1419152_at   | 310.39 | 0.13 | 2.18       | 3.06       | AK017673                 | 2810417H13Rik |
| 1448789_at   | 264.21 | 0.08 | 1.98       | 3.06       | AF253409                 | Aldh1a3       |
| 1454737_at   | 100.68 | 0.00 | 1.98       | 3.06       | AV295798                 | Dusp9         |
| 1433845_x_at | 101.96 | 0.00 | 1.96       | 3.01       | AV295798                 | Dusp9         |
| 1434279_at   | 119.23 | 0.00 | 1.99       | 3.01       | BG976607                 | Mtm1          |
| 1421523_at   | 123.60 | 0.00 | 1.95       | 2.98       | NM_008004                | Fgf17         |
| 1439568_at   | 103.16 | 0.00 | 1.94       | 2.97       | AV373997                 | Greb1         |
| 1426598_at   | 289.68 | 0.09 | 1.94       | 2.96       | BB742957                 | Uty           |
| 1424951_at   | 99.61  | 0.00 | 1.94       | 2.95       | BC015459                 | Baiap2l1      |
| 1444596_at   | 130.66 | 0.00 | 1.93       | 2.95       | AW493093                 | Pax7          |
| 1416579_a_at | 118.50 | 0.00 | 1.93       | 2.95       | BC005618                 | Tacstd1       |
| 1416232_at   | 227.24 | 0.06 | 1.93       | 2.93       | AB038697                 | Olig2         |
| 1423062_at   | 221.67 | 0.06 | 1.09       | 2.87       | AV175389                 | Igfbp3        |
| 1455930_at   | 115.56 | 0.00 | 1.09       | 2.87       | BI651113                 | LOC673503     |
| 1454904_at   | 144.12 | 0.00 | 1.09       | 2.86       | BG976607                 | Mtm1          |
| 1430143_at   | 125.21 | 0.00 | 1.89       | 2.84       | AK015205                 | 4930426D05Rik |
| 1456673_at   | 147.17 | 0.00 | 1.89       | 2.84       | AW554761                 | AL022943      |
| 1449545_at   | 154.75 | 0.02 | 1.88       | 2.82       | NM_008005                | Fgf18         |

|              |        |      |      |      |           |               |
|--------------|--------|------|------|------|-----------|---------------|
| 1420555_at   | 149.01 | 0.00 | 1.87 | 2.79 | NM_007441 | Alx3          |
| 1424942_a_at | 183.46 | 0.06 | 1.87 | 2.79 | BC006728  | Myc           |
| 1417845_at   | 153.02 | 0.00 | 1.86 | 2.76 | BC005718  | Cldn6         |
| 1449187_at   | 204.86 | 0.05 | 1.84 | 2.71 | BB371842  | Pdgfa         |
| 1429055_at   | 187.18 | 0.06 | 1.83 | 2.69 | BB559293  | 4930506M07Rik |
| 1442180_at   | 186.41 | 0.06 | 1.82 | 2.66 | BB382040  | Dleu7         |
| 1434280_at   | 258.60 | 0.07 | 1.82 | 2.66 | BG976607  | Wiz           |
| 1432591_at   | 179.11 | 0.06 | 1.81 | 2.65 | BB635017  | Pappa         |
| 1458268_s_at | 248.77 | 0.06 | 1.81 | 2.64 | AI649005  | Igfbp3        |
| 1421727_at   | 141.11 | 0.00 | 1.08 | 2.63 | NM_010164 | Eya1          |
| 1435022_at   | 195.32 | 0.06 | 1.08 | 2.62 | BB366930  | Cart1         |
| 1418376_at   | 199.78 | 0.05 | 1.08 | 2.62 | NM_008003 | Fgf15         |
| 1460044_at   | 292.65 | 0.09 | 1.79 | 2.61 | BB389395  | ---           |
| 1435338_at   | 164.02 | 0.04 | 1.79 | 2.59 | BM238926  | Cdk6          |
| 1437752_at   | 273.49 | 0.07 | 1.78 | 2.57 | BB706377  | Lin28         |
| 1434278_at   | 246.65 | 0.06 | 1.78 | 2.57 | BG976607  | Mtm1          |
| 1423340_at   | 237.90 | 0.06 | 1.77 | 2.56 | AV334599  | Tcfap2b       |
| 1449169_at   | 220.01 | 0.06 | 1.77 | 2.54 | NM_008216 | Has2          |
| 1427633_a_at | 179.22 | 0.06 | 1.77 | 2.54 | AF439513  | Pappa         |
| 1418601_at   | 239.71 | 0.06 | 1.74 | 2.49 | NM_011921 | Aldh1a7       |
| 1416316_at   | 232.20 | 0.06 | 1.74 | 2.49 | BC013442  | Slc27a2       |
| 1450517_at   | 348.94 | 0.15 | 1.73 | 2.46 | NM_009317 | Tal2          |
| 1429951_at   | 465.42 | 0.21 | 1.73 | 2.45 | AK005150  | Ssbp2         |
| 1422866_at   | 201.99 | 0.05 | 1.72 | 2.43 | NM_007731 | Col13a1       |
| 1434606_at   | 215.15 | 0.07 | 1.71 | 2.41 | BF140685  | Erbp3         |
| 1454623_at   | 227.16 | 0.06 | 1.07 | 2.39 | BG141511  | Cpa2          |
| 1457693_a_at | 213.92 | 0.05 | 1.69 | 2.35 | AV343405  | 6430537H07Rik |
| 1452936_at   | 284.25 | 0.07 | 1.68 | 2.34 | AV341285  | Crtac1        |
| 1428142_at   | 297.16 | 0.10 | 1.68 | 2.34 | AK003461  | Etv5          |
| 1429809_at   | 444.57 | 0.20 | 1.68 | 2.33 | AK018506  | Tmtc2         |
| 1418424_at   | 280.25 | 0.07 | 1.68 | 2.33 | NM_009398 | Tnfaip6       |
| 1442315_at   | 259.04 | 0.07 | 1.67 | 2.32 | AI426778  | AI426778      |
| 1424152_at   | 316.69 | 0.14 | 1.67 | 2.31 | BG064756  | ---           |
| 1426606_at   | 316.61 | 0.14 | 1.66 | 2.29 | BB426194  | Crtac1        |
| 1416693_at   | 373.66 | 0.16 | 1.66 | 2.29 | NM_013519 | Foxc2         |
| 1435695_a_at | 248.96 | 0.06 | 1.65 | 2.28 | AA673177  | A030007L17Rik |
| 1450990_at   | 260.97 | 0.06 | 1.65 | 2.27 | AW107802  | Gpc3          |
| 1428837_at   | 253.20 | 0.07 | 1.65 | 2.27 | AK018108  | Klh14         |
| 1456069_at   | 286.80 | 0.10 | 1.64 | 2.26 | BM117918  | Dtna          |
| 1418499_a_at | 357.66 | 0.14 | 1.64 | 2.25 | NM_020574 | Kcne3         |
| 1434411_at   | 463.92 | 0.21 | 1.63 | 2.24 | BB114398  | ---           |
| 1437904_at   | 398.38 | 0.17 | 1.63 | 2.24 | BB821609  | Drbp1         |
| 1455280_at   | 325.21 | 0.15 | 1.64 | 2.24 | BI452538  | Frem1         |
| 1425094_a_at | 458.24 | 0.20 | 1.64 | 2.24 | AB031040  | Lhx6          |
| 1454966_at   | 319.76 | 0.15 | 1.63 | 2.23 | BQ175493  | Itga8         |
| 1436425_at   | 286.12 | 0.08 | 1.62 | 2.22 | BB486252  | Ankrd38       |
| 1434939_at   | 319.24 | 0.15 | 1.63 | 2.22 | BB437522  | Foxf1a        |
| 1427133_s_at | 334.09 | 0.14 | 1.62 | 2.21 | C80829    | Lrp2          |
| 1455287_at   | 325.58 | 0.14 | 1.61 | 2.19 | BM238926  | Cdk6          |
| 1418711_at   | 408.51 | 0.16 | 1.61 | 2.19 | BB371842  | Pdgfa         |
| 1416168_at   | 291.31 | 0.09 | 1.61 | 2.19 | NM_011340 | Serpinf1      |
| 1443240_at   | 324.94 | 0.15 | 1.61 | 2.18 | AV319208  | Gpc3          |
| 1427277_at   | 472.77 | 0.21 | 1.61 | 2.18 | BB137929  | Six1          |
| 1434171_at   | 351.54 | 0.15 | 1.06 | 2.17 | BB398891  | C330011K17Rik |
| 1456454_at   | 476.75 | 0.22 | 1.06 | 2.17 | BB759122  | Cart1         |
| 1435493_at   | 336.61 | 0.15 | 1.61 | 2.17 | AV297961  | Dsp           |
| 1420998_at   | 434.61 | 0.19 | 1.06 | 2.17 | BG966751  | Etv5          |
| 1424211_at   | 303.36 | 0.11 | 1.06 | 2.16 | BC011293  | 5730438N18Rik |
| 1430554_at   | 383.24 | 0.16 | 1.06 | 2.16 | BB524113  | Lrig3         |

|              |        |      |      |      |           |                        |
|--------------|--------|------|------|------|-----------|------------------------|
| 1426048_s_at | 464.33 | 0.21 | 1.59 | 2.15 | BC021623  | Hrc /// Tcfap2a        |
| 1417801_a_at | 349.59 | 0.15 | 1.59 | 2.15 | NM_008905 | Ppfibp2                |
| 1456935_at   | 476.46 | 0.22 | 1.59 | 2.14 | AI606473  | AI606473               |
| 1452968_at   | 431.96 | 0.19 | 1.59 | 2.14 | AK003674  | Cthrc1                 |
| 1449823_at   | 369.82 | 0.16 | 1.59 | 2.14 | NM_033605 | Dach2                  |
| 1456329_at   | 520.13 | 0.30 | 1.59 | 2.14 | BB130087  | Prtg                   |
| 1440005_at   | 511.99 | 0.30 | 1.58 | 2.12 | BB667396  | C730009D12             |
| 1425652_s_at | 420.25 | 0.17 | 1.58 | 2.12 | AF148511  | Rbpms                  |
| 1427436_at   | 417.90 | 0.17 | 1.58 | 2.11 | D83147    | Six2                   |
| 1428922_at   | 503.60 | 0.30 | 1.57 | 2.09 | AK004681  | 1200009O22Rik          |
| 1427489_at   | 126.67 | 0.00 | 1.92 | 2.09 | BB623587  | Itga8                  |
| 1424903_at   | 476.00 | 0.23 | 1.57 | 2.09 | AF127244  | Jarid1d                |
| 1435438_at   | 674.33 | 0.58 | 1.57 | 2.09 | AV345303  | Sox8                   |
| 1426438_at   | 507.44 | 0.30 | 1.56 | 2.08 | AA210261  | Ddx3y                  |
| 1430555_s_at | 484.72 | 0.23 | 1.56 | 2.08 | BB524113  | Lrig3                  |
| 1457867_at   | 216.16 | 0.06 | 1.87 | 2.08 | BB360745  | Sgpp2                  |
| 1452077_at   | 569.76 | 0.35 | 1.56 | 2.07 | AA210261  | Ddx3y                  |
| 1422523_at   | 565.90 | 0.34 | 1.56 | 2.07 | NM_021882 | Si                     |
| 1427523_at   | 395.26 | 0.16 | 1.56 | 2.07 | AI509029  | Six3 /// E130112M24Rik |
| 1449939_s_at | 388.23 | 0.16 | 1.55 | 2.06 | NM_010052 | Dlk1                   |
| 1452320_at   | 196.91 | 0.05 | 1.79 | 2.06 | C80829    | Lrp2                   |
| 1424797_a_at | 564.46 | 0.34 | 1.55 | 2.06 | U80011    | Pitx2                  |
| 1422723_at   | 378.48 | 0.16 | 1.55 | 2.06 | NM_009291 | Stra6                  |
| 1427284_a_at | 427.84 | 0.18 | 1.56 | 2.06 | AU019171  | Ttpa                   |
| 1435106_at   | 390.09 | 0.16 | 1.55 | 2.05 | AV024662  | 3732412D22Rik          |
| 1431704_a_at | 357.41 | 0.14 | 1.55 | 2.05 | AK018622  | Ralgps2                |
| 1436584_at   | 469.74 | 0.22 | 1.55 | 2.05 | BB529691  | Spry2                  |
| 1436791_at   | 438.54 | 0.19 | 1.55 | 2.05 | BB067079  | Wnt5a                  |
| 1435943_at   | 467.93 | 0.22 | 1.54 | 2.04 | AI647687  | Dpep1                  |
| 1457086_at   | 552.23 | 0.32 | 1.55 | 2.04 | AW123201  | LOC434147              |
| 1435555_at   | 399.66 | 0.17 | 1.54 | 2.03 | AW552088  | ---                    |
| 1453985_at   | 257.56 | 0.07 | 1.66 | 2.03 | AK002307  | 0610007P08Rik          |
| 1419593_at   | 264.03 | 0.08 | 1.66 | 2.03 | NM_015764 | Greb1                  |
| 1450723_at   | 767.05 | 0.87 | 1.54 | 2.03 | BQ176915  | Isl1                   |
| 1434441_at   | 342.16 | 0.15 | 1.62 | 2.02 | BB525584  | 1110018J18Rik          |
| 1455735_at   | 424.02 | 0.17 | 1.54 | 2.02 | AW259574  | Ap1s3                  |
| 1460513_a_at | 402.91 | 0.16 | 1.54 | 2.02 | AK017486  | Ednra                  |
| 1415857_at   | 474.46 | 0.22 | 1.53 | 2.02 | BG064842  | Emb                    |
| 1438410_at   | 621.30 | 0.44 | 1.54 | 2.02 | BB295128  | Prtg                   |
| 1428853_at   | 492.81 | 0.25 | 1.62 | 2.02 | BG071079  | Ptch1                  |
| 1424153_s_at | 502.99 | 0.30 | 1.53 | 2.02 | BG064756  | Sall4                  |
| 1429768_at   | 516.50 | 0.30 | 1.53 | 2.01 | BB355121  | Dtna                   |
| 1450082_s_at | 576.85 | 0.35 | 1.53 | 2.01 | BG966751  | Etv5                   |
| 1433512_at   | 492.59 | 0.25 | 1.57 | 2.01 | BB138212  | Fli1                   |
| 1451691_at   | 487.57 | 0.24 | 1.53 | 2.00 | BC008277  | Ednra                  |
